# Supplementary material for: Combinatorial Therapy of Letrozole- and Quercetin-Loaded Spanlastics for Enhanced Cytotoxicity against MCF-7 Breast Cancer Cells
Source: MDPI journal article supplement (doi:10.3390/pharmaceutics14081727), 2022-08-18
Supplement: s1 [file s1]

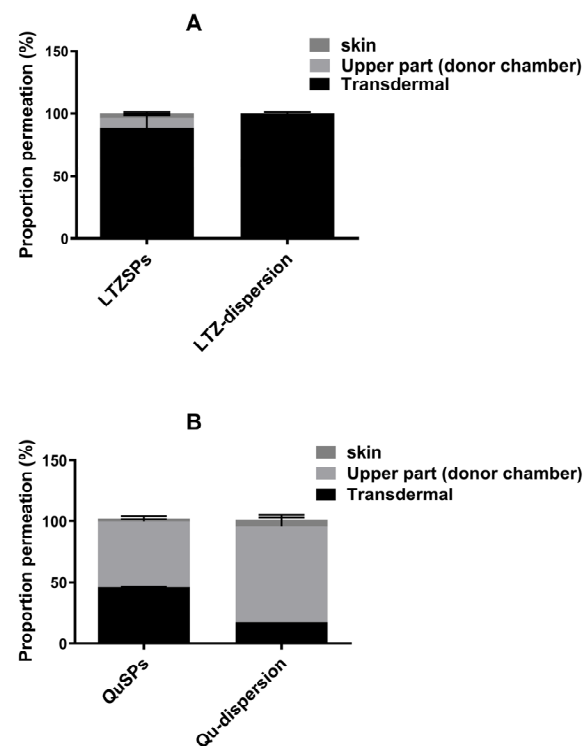

**Figure S1.** Proportions of the permeated amount of (A) LTZ from LTZSPs and LTZ-dispersion (B) Qu from QuSPs and Qu-dispersion through rat skin after 24-h incubation. Skin: stratum corneum, epidermis and dermis, while transdermal: receptor chamber. Abbreviations: LTZ; letrozole, Qu; Quercetin, LTZSPs; letrozole loaded spanlastics, QuSPs; Quercetin loaded spanlastics.

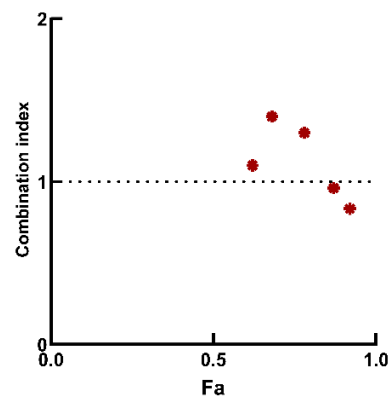

**Figure S2.** Combination index versus fraction affected plot for LTZSPs and QuSPs combination. Abbreviations: Fa; fraction affected, LTZSPs; letrozole-loaded spanlastics, QuSPs; quercetin-loaded spanlastics.

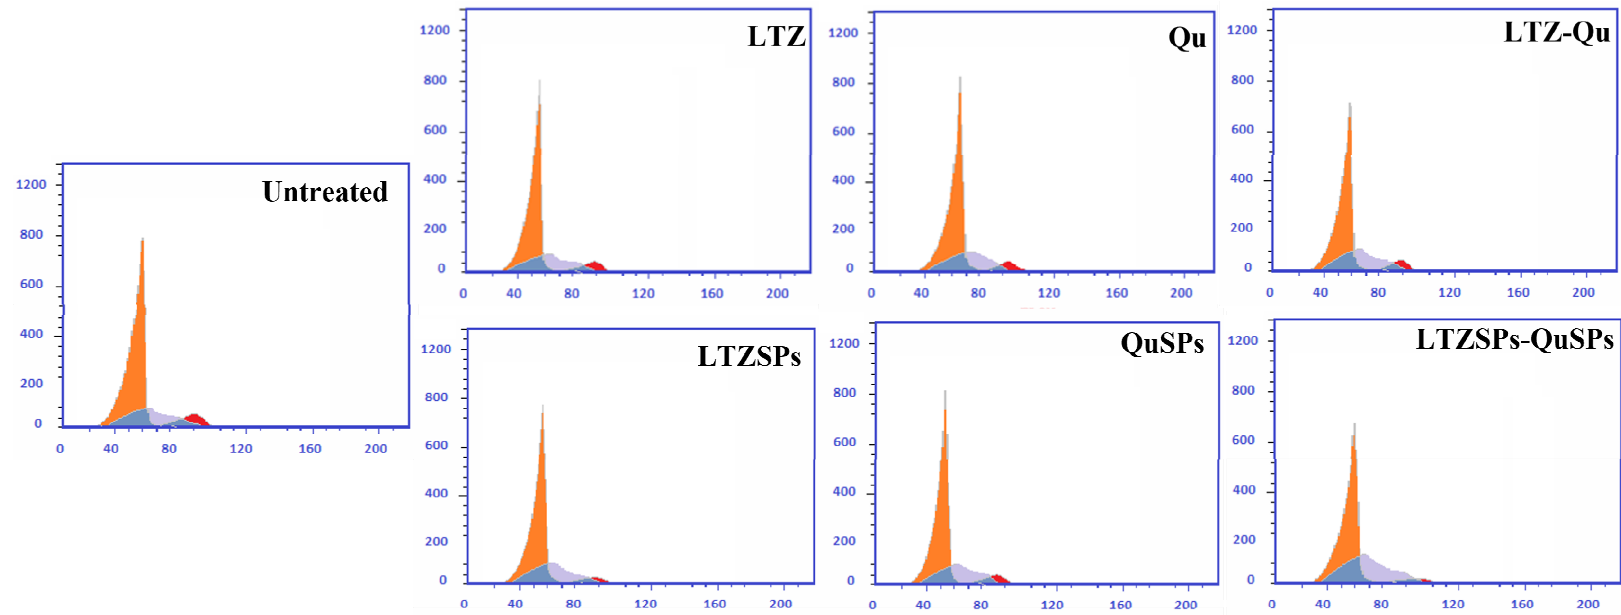

**Figure S3.** Cell cycle profile of MCF-7 cells treated with soluble LTZ, Qu, and their combination, LTZSPs, QuSPs and their combination.
